# Supplementary material for: Hydrothermal syntheses, crystal structures and properties of novel quinone biradical and mixed-valence copper coordination polymer with semiquinone radical ligand generated in situ
Source: Royal Society of Chemistry journal article supplement (doi:10.1039/c2ce26418h), 2012-01-01
Supplement: c2ce26418h.pdf [file c2ce26418h.pdf]

## Electronic Supplementary Information

**Hydrothermal syntheses, crystal structures and properties of novel quinone biradical and mixed-valence copper coordination polymer with semiquinone radical ligand generated *in situ***

**Guo-Ping Yong,\* Yi-Man Zhang and Bei Zhang**

Department of Chemistry, University of Science and Technology of China, Hefei 230026, P. R. China

E-mail: gpyong@ustc.edu.cn

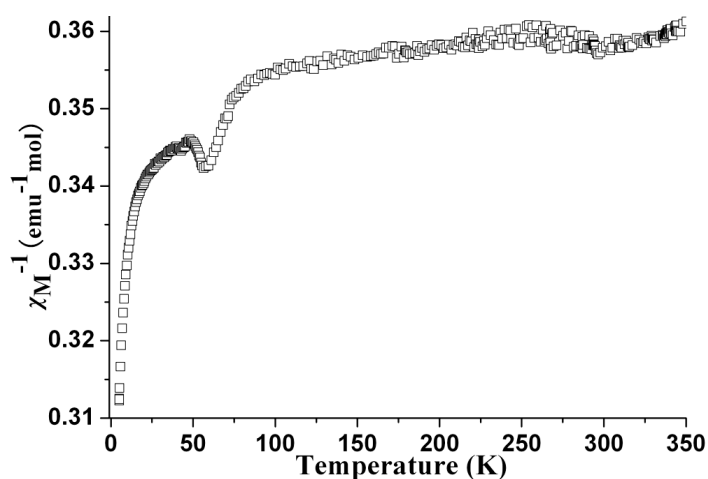

**Fig. S1** Plot of  $\chi_M^{-1}$  vs.  $T$  for compound 1.

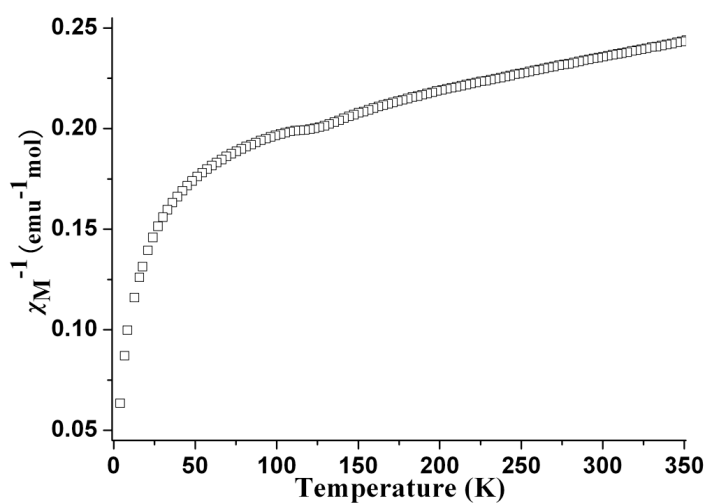

**Fig. S2** Plot of  $\chi_M^{-1}$  vs.  $T$  for compound 2.

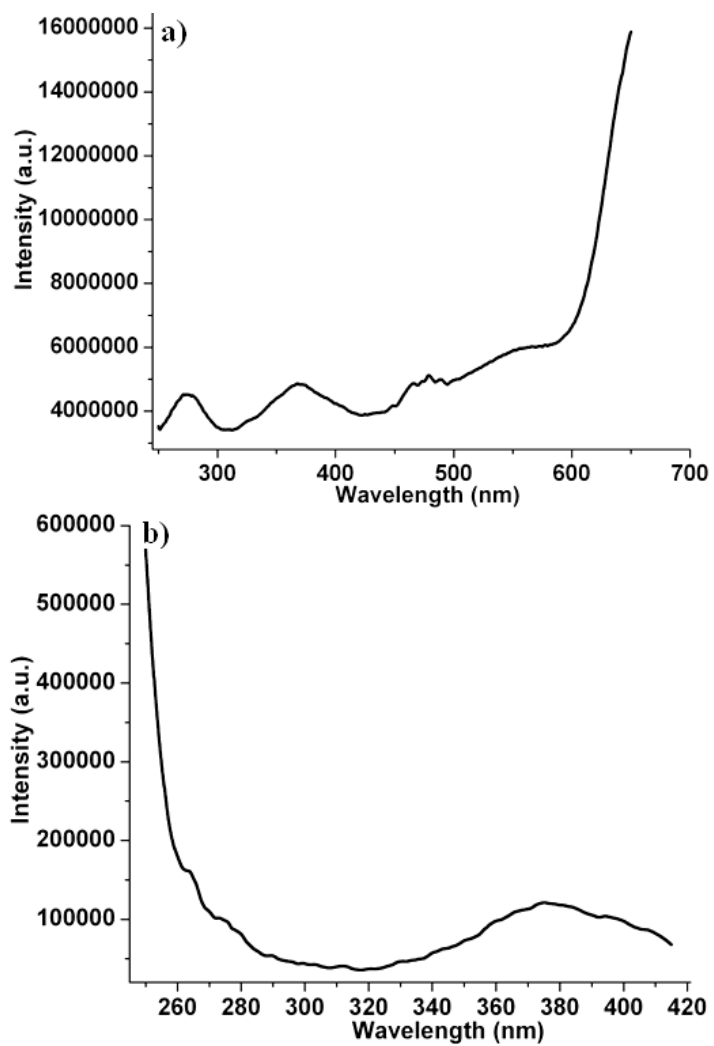

**Fig. S3** Room-temperature solid-state excitation spectra of **1** (a) and **2** (b) at emission wavelength of 685 and 413 nm, respectively.
